# Supplementary material for: A Ferroptosis-Related Gene Signature Identified as a Novel Prognostic Biomarker for Colon Cancer
Source: Front Genet. 2021 Jul 1;12:692426. doi: 10.3389/fgene.2021.692426 (PMC8280527; doi:10.3389/fgene.2021.692426)
Supplement: Supplementary Table 3 — Subtype-based differential expression pattern of prognostic FRGs between tumor and normal control tissues. [file Table_3.XLSX]

## Sheet: Sheet1
Table S3. Subtype-based differential expression pattern of prognostic FRGs between tumor and normal control tissues.
Gene	C1 vs. N		C2 vs. N		C3 vs. N		C4 vs. N		C5 vs. N		C6 vs. N
	logFC	adj.P.Val	logFC	adj.P.Val	logFC	adj.P.Val	logFC	adj.P.Val	logFC	adj.P.Val	logFC	adj.P.Val
ABCC1	1.60584	1.1e-27	1.348	8.34e-19	1.38745	1.14e-16	1.30203	3.51e-18	1.57923	1.69e-20	1.06152	2.66e-09
ATF3	-0.820556	9.63e-06	-0.828584	6.8e-06	-0.79268	0.000304597	-0.559975	0.015207	-0.893469	6.58e-07	-0.721116	0.00076542
AURKA	1.38152	1.10579e-24	1.01936	1.27595e-15	0.777149	3.0556e-08	0.427315	0.00554904	1.2735	1.47641e-18	0.804904	4.29311e-07
BID	1.02033	8.27e-15	0.861549	9.04e-14	0.881381	5.68e-12	0.546492	0.000442826	0.944924	7.3e-15	0.648532	2.64e-07
DUSP1	-1.17311	8.66949e-15	-1.00126	6.26626e-09	-1.18646	7.81273e-11	-0.53027	0.00376004	-1.12459	1.7984e-13	-0.657538	0.000104864
HELLS	0.986741	1.2816e-12	1.06573	3.01657e-11	0.813127	3.43539e-07	0.381489	0.0109676	0.961426	8.40279e-12	0.313444	0.0287673
NFS1	0.993767	3.53e-14	0.305586	0.0083521	0.354511	0.00155919	0.22393	0.069591	0.886732	4.52e-12	0.592668	6.21e-06
RRM2	2.10032	6.03e-27	2.30469	7.39e-28	1.89326	2.02e-14	1.07839	1.67e-05	1.77802	1.93e-19	1.25819	1.11e-07
SLC2A3	0.472147	0.00665728	1.53935	7.89e-09	0.295728	0.123922	2.12446	3.22e-12	1.19986	9.17e-06	0.741406	0.00104884
SLC1A4	0.704022	4.1818e-09	0.657285	8.74817e-07	0.419299	0.00017348	0.327803	0.0104811	0.704962	1.04043e-08	0.47395	1.1784e-05
TXNIP	-1.1295	1.15e-08	-0.901145	3.63e-06	-0.787968	0.000598149	-0.331456	0.0452554	-1.11888	1.04e-08	-0.370131	0.0193587
VLDLR	-1.80961	1.11e-11	-1.88998	2.07e-12	-1.64644	2.62e-09	-1.29108	1.05e-08	-1.87084	2.7e-13	-1.41632	3.18e-08
ZFP69B	0.8951	1.18e-12	0.683368	7.43e-06	0.679348	9.58e-11	0.60644	4.94e-06	0.85107	5.36e-10	0.594674	3.89e-06
